# Supplementary material for: Tumor-associated macrophages predict prognosis in diffuse large B-cell lymphoma and correlation with peripheral absolute monocyte count
Source: Springer Nature journal article supplement (doi:10.1186/s12885-019-6208-x), 2019-11-06
Supplement: MOESM1 [file 17356958]

**A**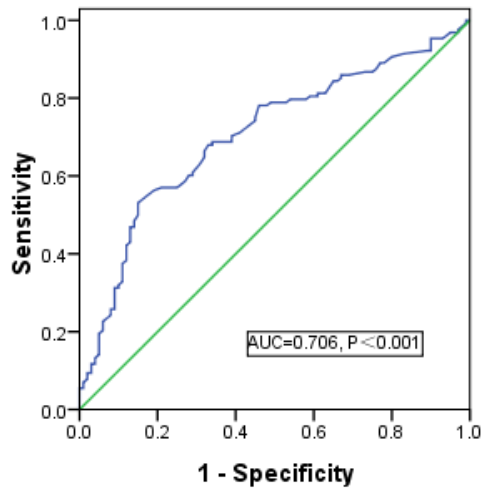**B**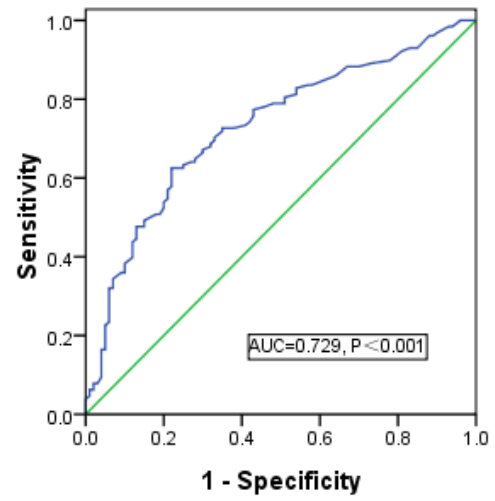

**Fig. S1** Receiver operating characteristic curve and area under the curve for (A) CD68+ cells/HPF, (B) CD163+ cells/HPF.

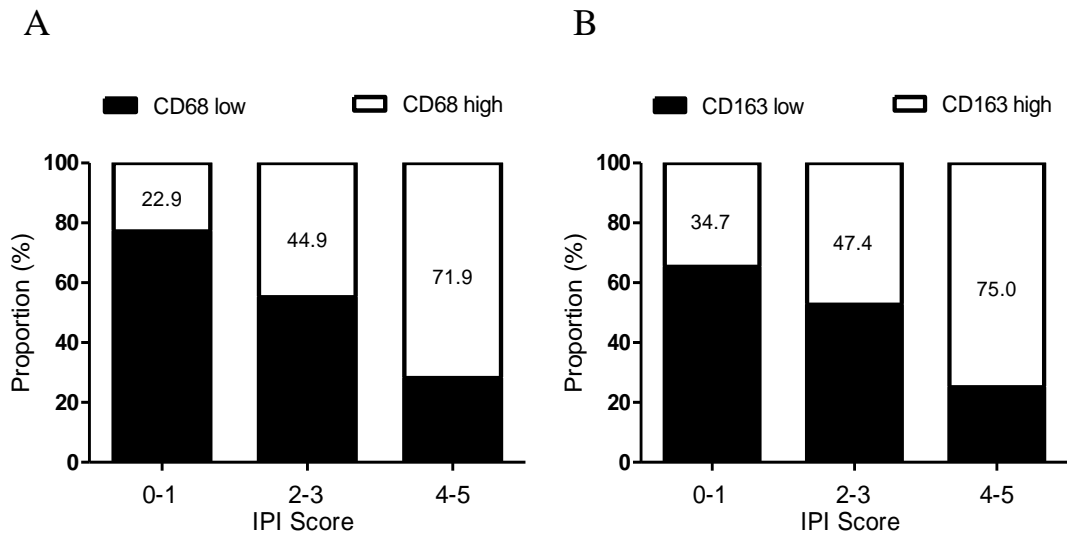

**Fig. S2** CD68 and CD163 expression in DLBCL. (A) Frequencies of CD68 expression level in IPI score=0-1, 2-3, and 4-5, (B) Frequencies of CD163 expression level in IPI score=0-1, 2-3, and 4-5.
